# Supplementary material for: Insights into liquid-crystalline shape-memory polyurethane composites based on an amorphous reversible phase and hexadecyloxybenzoic acid
Source: Royal Society of Chemistry journal article supplement (doi:10.1039/c3tc31612b), 2013-11-22
Supplement: c3tc31612b.pdf [file c3tc31612b.pdf]

**Insight into liquid crystalline shape memory polyurethane composites based on  
amorphous reversible phase and hexadecyloxybenzoic acid**

Shaojun Chen<sup>1</sup>, Hongming Yuan<sup>1</sup>, Zaochuan Ge<sup>1</sup>, Shiguo Chen<sup>1\*</sup>, Haitao Zhuo<sup>2\*</sup>,  
Jianhong Liu<sup>2</sup>

<sup>1</sup>Laboratory of Special Functional Materials, Shenzhen Engineering Laboratory for Advanced Technology of Ceramics, College of Materials Science and Engineering, Shenzhen University, Shenzhen, 518060, China.

<sup>2</sup>Shenzhen Key Laboratory of Functional Polymer, College of Chemistry and Chemical Engineering, Shenzhen University, Shenzhen, 518060, China.

\*Corresponding author: College of Materials Science and Engineering, Shenzhen University, Shenzhen 518060, China. Tel or Fax: +86-755-26534562. E-mail: [csq@szu.edu.cn](mailto:csq@szu.edu.cn);  
[haitaozhuo@163.com](mailto:haitaozhuo@163.com);

**Supporting Information**

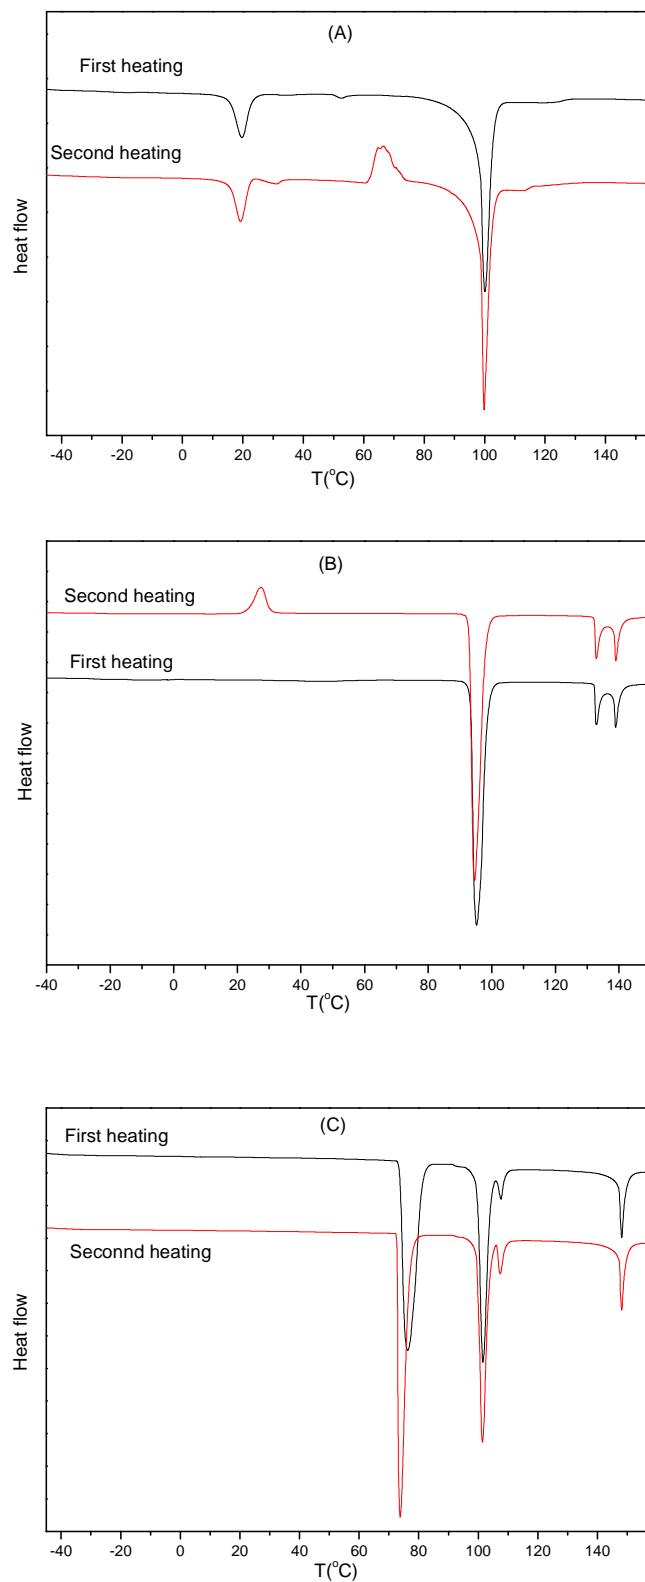

FIGURE A. DSC curves (first heating and second heating) of (A) HOBA; (B) 4-dodecyloxybenzoic acid; (C) 4-octyloxybenzoic acid

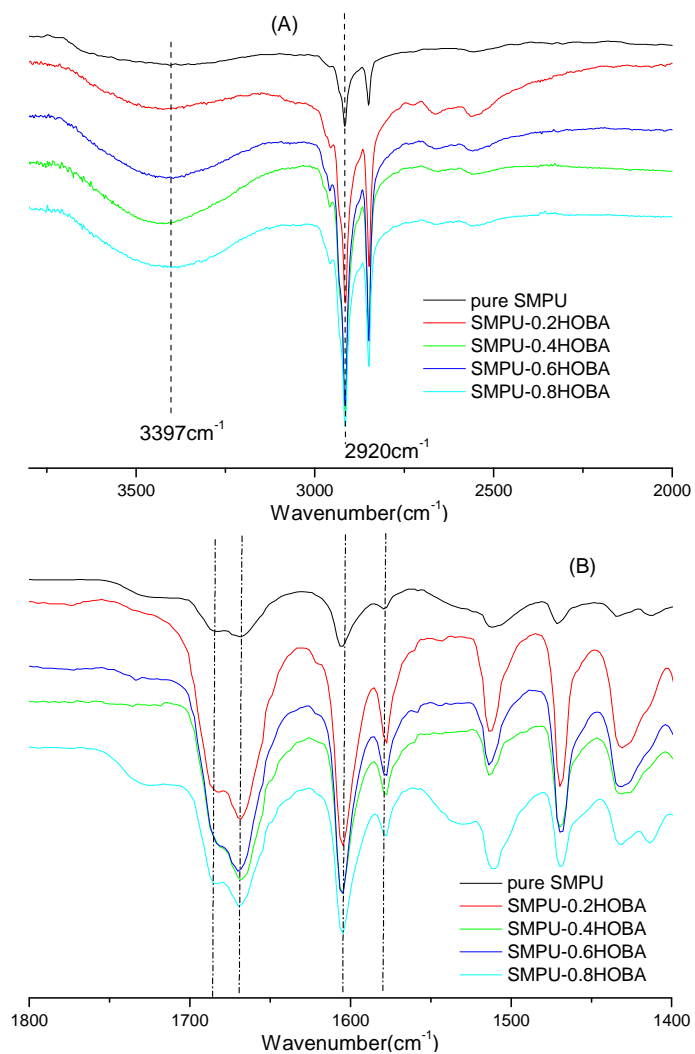

Figure B. FT-IR spectra of SMPU-LC composites with different HOBA content

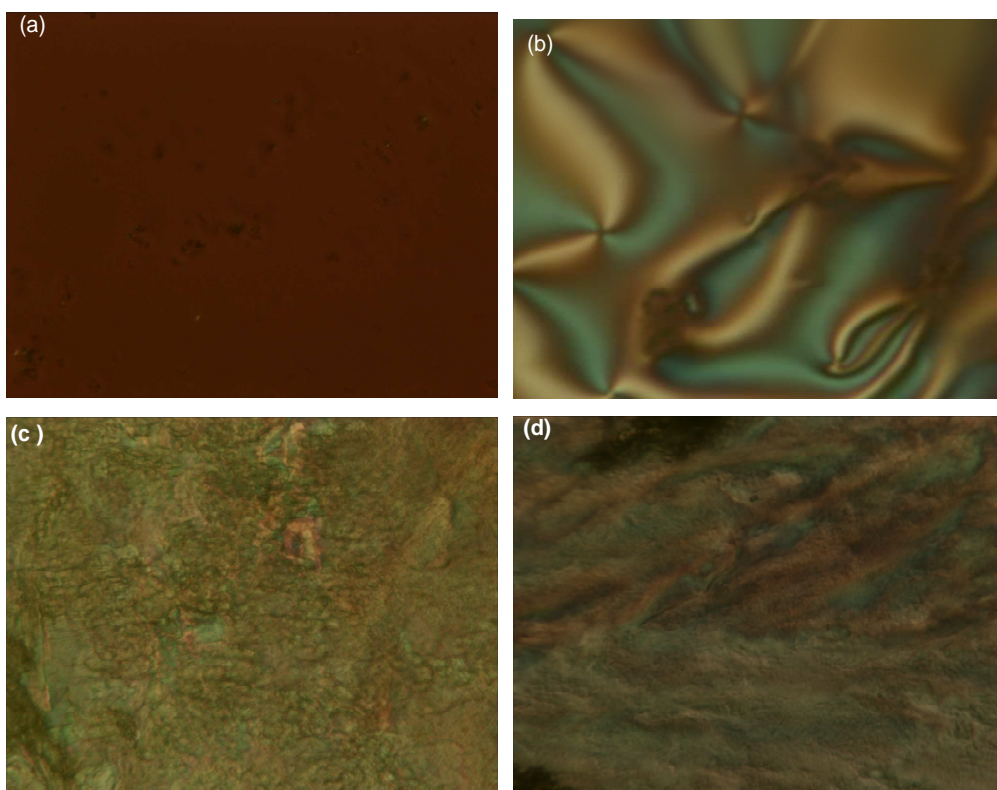

Figure C. POM pictures ( $\times 400$ ) of pure HOBA at different temperature (a-  $135^{\circ}\text{C}$  showing the isotropic phase; b- $125^{\circ}\text{C}$  showing the nematic phase; c- $50^{\circ}\text{C}$  showing the crystalline phase, d- $20^{\circ}\text{C}$  showing the crystalline phase)

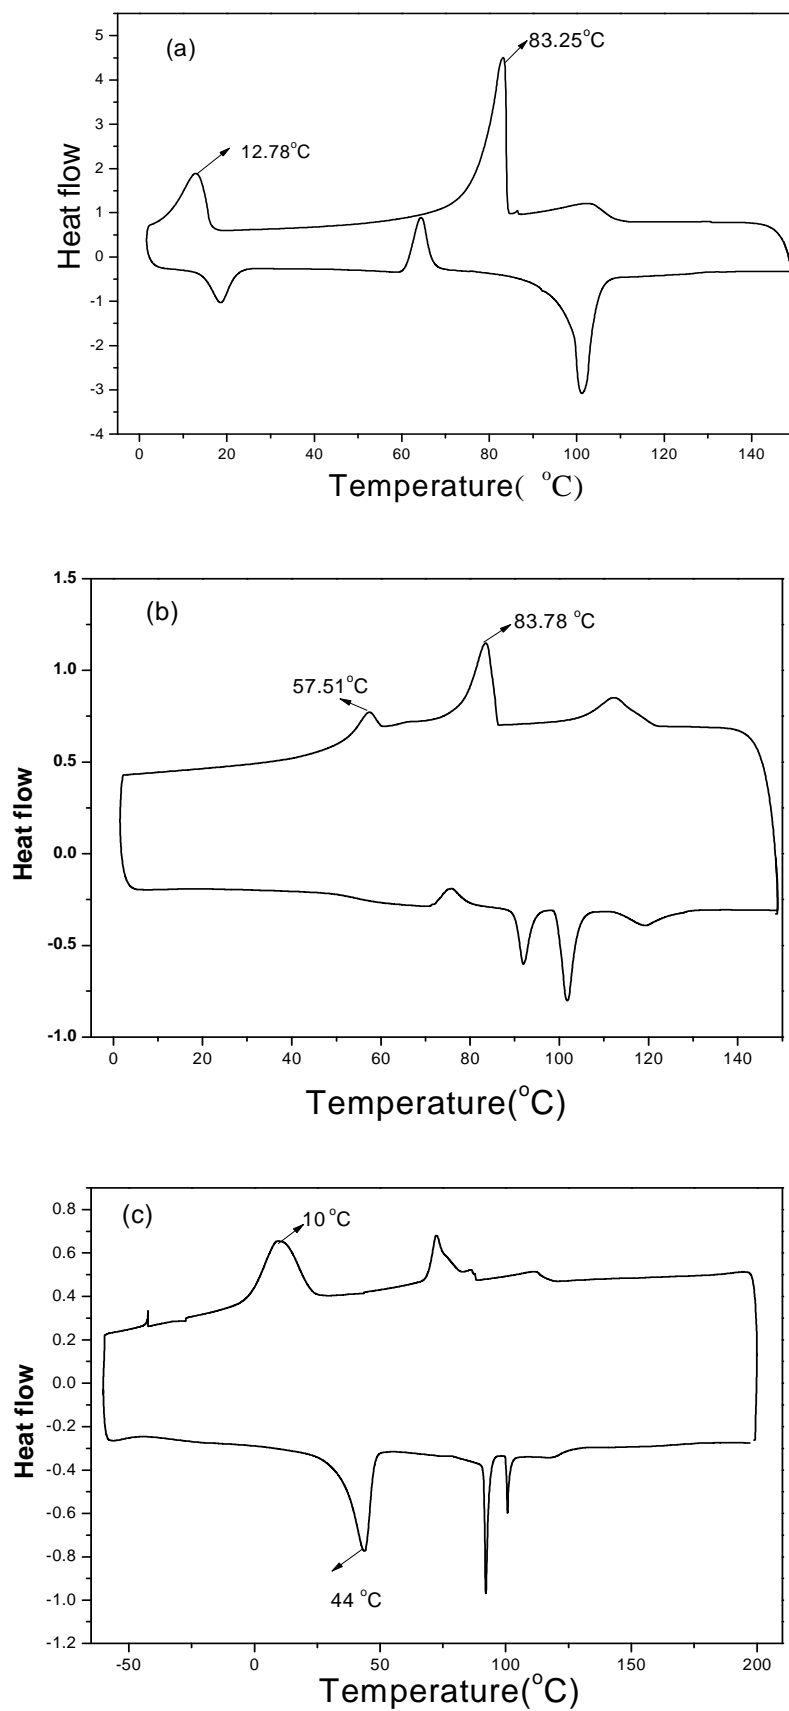

FIGURE D. DSC curves of pure HOBA (a), SMPU-LC composites based on amorphous reversible phase (b), and SMPU-LC composites based on semi-crystalline reversible phase (c)

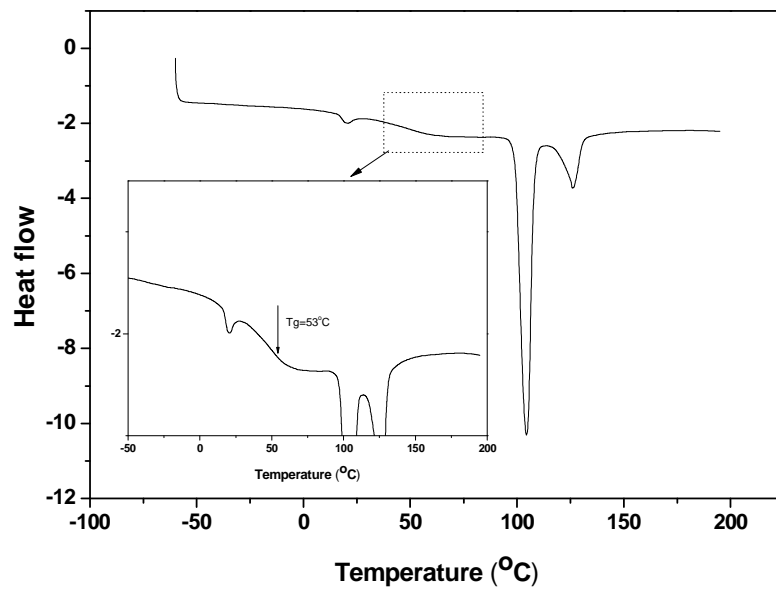

Figure E. the second DSC heating curves of sample SMPU-0.8HOBA
